# Supplementary material for: Sarcomas in the United States: Recent trends and a call for improved staging
Source: PubMed Central journal article supplement (PMC6497437; doi:10.18632/oncotarget.26809), 2019-03-29
Supplement: oncotarget-10-2462-s001.pdf [file oncotarget-10-2462-s001.pdf]

## **Sarcomas in the United States: Recent trends and a call for improved staging**

### **SUPPLEMENTARY MATERIALS**

#### **Appendix A: Inclusion and exclusion using International Classification for Oncology, 3rd edition (ICD-O-3) histology codes**

See Supplementary File 1
